# Supplementary material for: Effect of β-caryophyllene from Cloves Extract on Helicobacter pylori Eradication in Mouse Model
Source: MDPI journal article supplement (doi:10.3390/nu12041000), 2020-04-04

**Supplementary Figure S1.** In vitro effect of H-002119-00-001 on bacterial colonization

(A) After treatment with 0.1 M H-002119-00-001, the number of bacteria showed over  $3.0 \times 10^2$  CFU/mL. (B) After treatment with 0.01 M H-002119-00-001, the number of bacteria showed over  $3.0 \times 10^2$  CFU/mL. (C) After treatment with 0.001 M H-002119-00-001, the number of bacteria showed over  $3.0 \times 10^2$  CFU/mL.

(A)

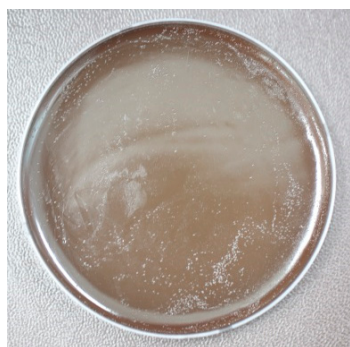

(B)

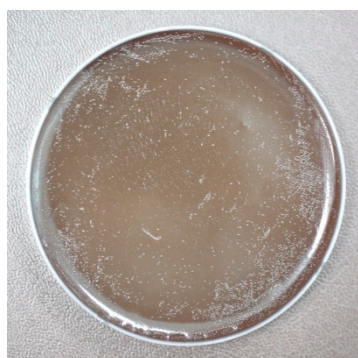

(C)

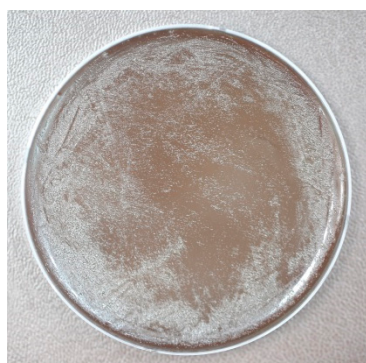

Supplement: s1 [file s1]
